# Supplementary material for: CBX4 Regulates Replicative Senescence of WI-38 Fibroblasts
Source: PubMed Central journal article supplement (PMC8890863; doi:10.1155/2022/5503575), 2022-02-23
Supplement: 5503575.f1.pdf [file 5503575.f1.pdf]

*Supplementary materials*

## **CBX4 Regulates Replicative Senescence of WI-38 Fibroblasts**

Yu-Hsiu Chen<sup>1,2,6</sup>, Xin Zhang<sup>1,3</sup>, Kuei-Yueh Ko<sup>4</sup>, Ming-Feng Hsueh<sup>1,3</sup>, Virginia Byers Kraus<sup>1,3,5,6</sup>

<sup>1</sup> Duke Molecular Physiology Institute, Duke University, Durham, NC, USA

<sup>2</sup> Division of Rheumatology/Immunology/Allergy, Department of Internal Medicine  
Tri-Service General Hospital, National Defense Medical Center

<sup>3</sup> Department of Orthopaedic Surgery, Duke University, Durham, NC, USA

<sup>4</sup> Department of Biostatistics & Bioinformatics, Duke University, Durham, NC, USA

<sup>5</sup> Department of Medicine, Duke University School of Medicine, Durham, NC, USA

<sup>6</sup> Department of Pathology, Duke University Medical Center, Durham, NC, USA

Corresponding Author: Virginia Byers Kraus

Address: 300 N Duke St, Durham, NC 27701

Email: vbk@duke.edu

Table S1. Primers used for RT-PCR detection of senescence target genes.

|        | F                          | R                        |
|--------|----------------------------|--------------------------|
| CBX4   | Qiagen, 330001 (PPH19160A) |                          |
| CDKN2A | Qiagen, 330001 (PPH00207C) |                          |
| YWHAZ  | CTGAGGTTGCAGCTGGTGATGACA   | AGCAGGCTTTCTCAGGGGAGTTCA |
| LMNB1  | GAAAAAGACAACCTCTCGTCGCA    | GTAAGCACTGATTTCCATGTCCA  |
| DPP4   | AAAGGCACCTGGGAAGTCATCG     | CAGCTCACAACCTGAGGCATGTC  |
| CDKN2A | GGACAGCAGAGGAAGACCAT       | GGCGTTTGGAGTGGTAGAAA     |

Table S2. qPCR custom microarray panel (Qiagen, 330171)

| Gene Symbol | Assay Catalog # | Gene Symbol | Assay Catalog # | Gene Symbol | Assay Catalog # |
|-------------|-----------------|-------------|-----------------|-------------|-----------------|
| GDC         | PPH65835A       | PPC         | PPX63339A       | RTC         | PPX63340A       |
| B2M         | PPH01094E       | YWHAZ       | PPH01017A       | 18SrRNA     | PPH05666E       |
| PVRL4       | PPH09678B       | PRODH       | PPH00877A       | LY6D        | PPH19736C       |
| DAO         | PPH11264A       | EPN3        | PPH13321A       | SLC52A1     | PPH11141A       |
| BAX         | PPH00078B       | BCL2        | PPH00079B       | MDM4        | PPH00875E       |
| MDM2        | PPH00193E       | FAS         | PPH00141B       | TP53        | PPH00213F       |
| TP63        | PPH01032F       | CDK1        | PPH00116C       | CDK4        | PPH00118F       |
| CDKN1A      | PPH00211E       | CDKN2A      | PPH00207C       | ATM         | PPH00325C       |
| STAT1       | PPH00811C       | STAT3       | PPH00708F       | NFKB1       | PPH00204F       |
| TNF         | PPH00341F       | IL6         | PPH00560C       | CXCL8       | PPH00568A       |
| HDAC1       | PPH01735F       | RB1         | PPH00228F       | E2F3        | PPH00917F       |
| E2F1        | PPH00136G       | E2F7        | PPH19766A       | SUMO1       | PPH00973F       |
| CSNK2A2     | PPH02197F       | DNMT1       | PPH01055F       | SOX2        | PPH02471A       |
| PARP1       | PPH00686B       | MYC         | PPH00100B       | RING1       | PPH14334B       |
| BMI1        | PPH57778A       | CBX4        | PPH19160A       | DPP4        | PPH00035B       |
| SIRT1       | PPH02188A       | PCNA        | PPH00216B       | ATR         | PPH01318B       |

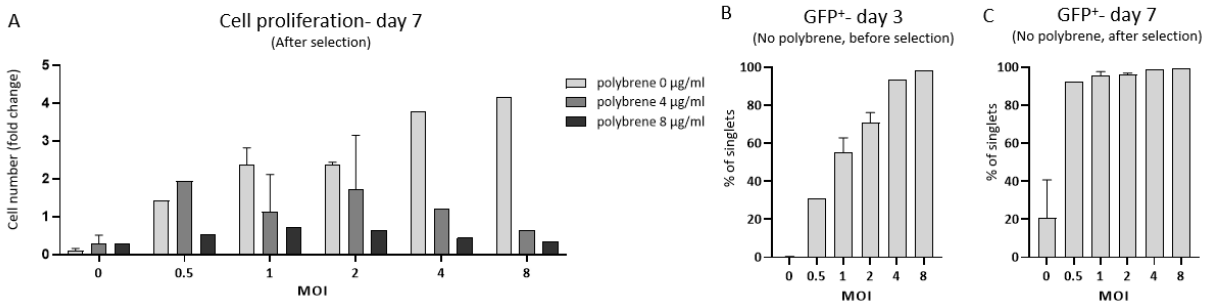

**Figure S1. Transduction efficiency of copGFP control lentiviral particles with different MOI and with/without adding polybrene.** A) Cell proliferation of WI-38 cells in response to the copGFP control lentiviral particles with and without adding polybrene. Cells numbers were measured by flow-cytometry; fold changes, computed as a ratio of day 7 harvested cell numbers to the day 3 seeded cell numbers, showed a cytotoxic effect of using polybrene comparing results for 0, 4 and 8 µg/ml polybrene. B) Without added polybrene, the percentage of GFP expressing cells determined by flow-cytometry three days after transduction at different multiplicity of infection (MOI) ranging from 0-8. C) Without added polybrene, the percentage of GFP expressing cells (determined by flow-cytometry) 7 days after transduction with puromycin 0.5 µg/ml selection for 4 days.

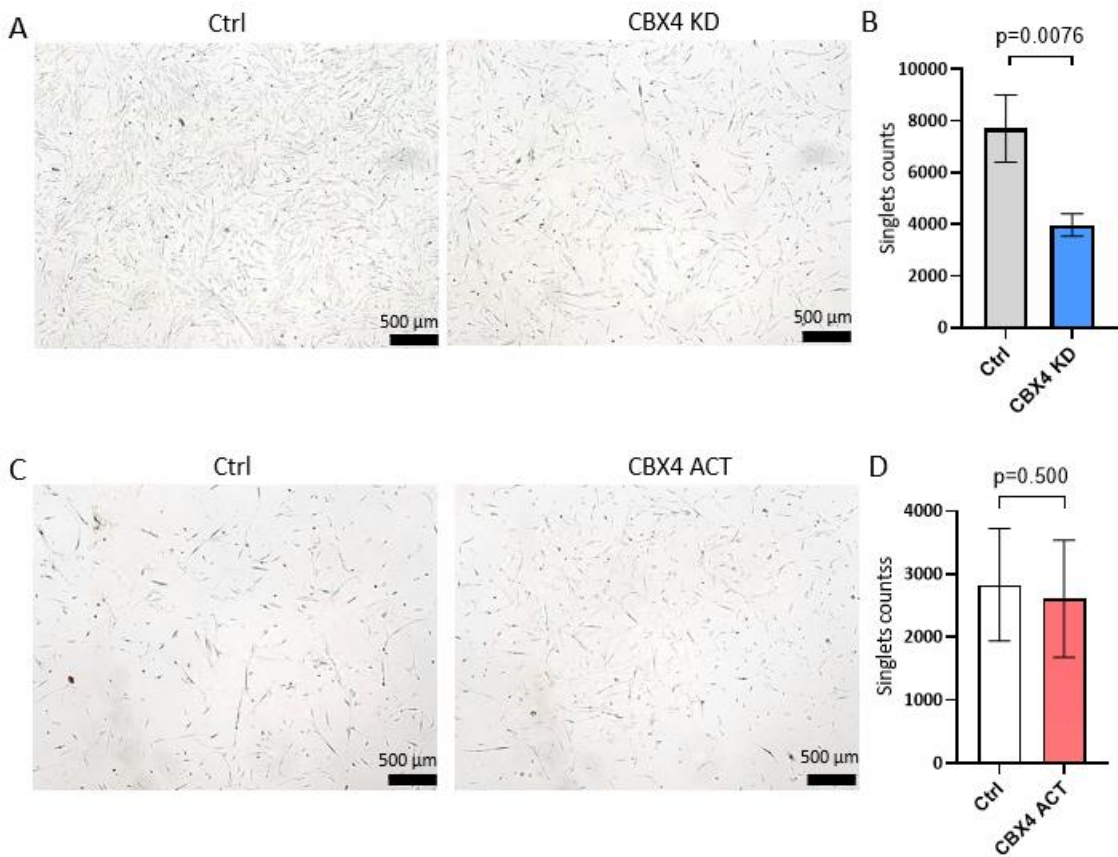

**Figure S2. Number of WI-38 cells in response to CBX4 knockdown (KD) or activation (ACT) compared to control (Ctrl).** A) Representative microscopic image of Ctrl and CBX4 KD in pre-senescent WI-38. B) Cell numbers were measured by flow-cytometric acquisition, gating singlets from 1 well/24 well plate (n=11, ctrl grey, CBX4 KD light blue). C) Representative microscopic image of Ctrl and CBX4 ACT in pre-senescent WI-38. D) Cell numbers were measured by flow-cytometric acquisition gating singlets from 1 well/24 well plate (n=7, ctrl white, CBX4 ACT light red).

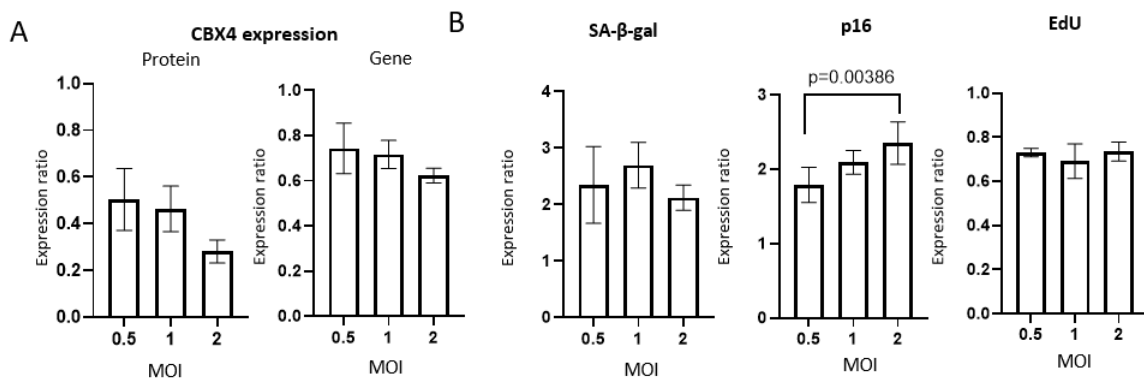

**Figure S3. Effect of CBX4 knockdown on senescence outcomes in WI-38 cells.** A) CBX4 protein and gene expression knockdown at different MOI by shRNA lentiviral particles at MOI 0.5, 1, and 2; protein n=4, 6 and 4 replicates, respectively ( $p=0.137$  for difference by MOI) and gene n=3, 5 and 3 replicates, respectively ( $p=0.113$  for replicates). B) Senescence markers were compared between MOI 0.5, 1 and 2 (n=3, 5 and 3, respectively): SA- $\beta$ gal activity ( $p=0.550$ ), and EdU ( $p=0.9746$ ) did not show a significant difference by MOI dosage; p16 protein expression was higher at MOI 2 compared to MOI 0.5 ( $p=0.0386$ ). A mixed-effects model was used to compare the effects of CBX4 knockdown.
